# Supplementary material for: Large Scale Proteomic Data and Network-Based Systems Biology Approaches to Explore the Plant World
Source: Proteomes. 2018 Jun 3;6(2):27. doi: 10.3390/proteomes6020027 (PMC6027444; doi:10.3390/proteomes6020027)
Supplement: Supplementary file 1 [file proteomes-06-00027-s001.xls]

## Sheet: Table S1
	Table S1: Representative list of bioinformatic tools to assist researchers in -omic data processing, from profiling to networking.
		Tool	link	Features
	Genome	ARAPORT	https://www.araport.org/	Data resource for comparative functional genomics in plant species
		GRAMENE	http://www.gramene.org/
		10001 Genomes	http://1001genomes.org/index.html	A. thaliana genetic variation database High-throughput sequence data analysis
		featureCounts	http://bioinf.wehi.edu.au/featureCounts/
		HTSeq-count	https://htseq.readthedocs.io/en/release_0.9.1/
		fastQC	https://www.bioinformatics.babraham.ac.uk/projects/fastqc/	High-throughput data quality check
		multiQC	http://multiqc.info/
		DEseq2	https://bioconductor.org/packages/release/bioc/html/DESeq2.html	Analysis of differentially expressed genes
	Transcriptome	EDGE R	http://bioconductor.org/packages/release/bioc/html/edgeR.html	RNA-seq analysis
		GLIMMA	http://bioconductor.org/packages/release/bioc/html/Glimma.html
		STAR	https://github.com/alexdobin/STAR	Reads alignment
		HISAT	https://ccb.jhu.edu/software/hisat/index.shtml
		Limma R-package	https://bioconductor.org/packages/release/bioc/html/limma.html	Analysis of microarray and NGS data
		GSEA	http://software.broadinstitute.org/gsea/index.jsp	GO analysis
		clusterProfile	https://bioconductor.org/packages/release/bioc/html/clusterProfiler.html
		agriGO	http://bioinfo.cau.edu.cn/agriGO/
		DAVID	https://david.ncifcrf.gov/home.jsp
		WGCNA R-package	https://labs.genetics.ucla.edu/horvath/CoexpressionNetwork/Rpackages/WGCNA/	Co-expression network, topology
		SWIM	http://www.nature.com/articles/srep44797#supplementary-information
		PLANEX	http://planex.plantbioinformatics.org/	Plant Co-expression database
		CORNET	https://bioinformatics.psb.ugent.be/cornet/	PPI Plant / Co-expression database
	Proteome	Proteome Discoverer 2.1	https://www.thermofisher.com/order/catalog/product/OPTON-30795	Database search engine
		X!Tandem	http://www.thegpm.org/tandem/
		Peaks 5.8	http://www.bioinfor.com/download-peaks-studio/	Database search engine / Denovo sequencing
		MaxQuant	http://www.coxdocs.org/doku.php?id=maxquant:common:download_and_installation	Database search engine / Quantitative analysis
		Skyline	https://skyline.ms/project/home/software/Skyline/begin.view	SRM / MRM and DIA SWATH data processing
		CENSUS	http://fields.scripps.edu/census/index.php.	GO analysis
		PSEA-Quant	http://pseaquant.scripps.edu/
		GEPHI	https://gephi.org/	Network analysis
		IGRAPH R-Package	http://igraph.org/r/
		Cytoscape	http://www.cytoscape.org/
		Ingenuity	https://www.qiagenbioinformatics.com/products/ingenuity-pathway-analysis/
		FASTCENTI	http://www.cbmc.it/fastcent/	Network topological analysis
	Metabolome	Collection of metabolic tools	https://raspicer.github.io/MetabolicTools/	Metabolomic data processing
		AMIX	https://www.bruker.com/products/mr/nmr/nmr-software/nmr-software/amix/overview.html
		XCMSPlus	https://sciex.com/products/software/xcms-plus-software
		PRIMeLink	http://spectra.psc.riken.jp/menta.cgi/primelink/index
		Compound Discoverer 2.1	https://www.thermofisher.com/it/en/home/products-and-services/promotions/industrial/download-compound-discoverer-2-free-trial.html
